# Supplementary material for: The diversity and ecological roles of Penicillium in intertidal zones
Source: PubMed Central journal article supplement (PMC6753150; doi:10.1038/s41598-019-49966-5), 2019-09-19

Supplementary Information

**The diversity and ecological roles of *Penicillium* in intertidal zones**

Myung Soo Park<sup>1</sup>, Seung-Yoon Oh<sup>1</sup>, Jonathan J. Fong<sup>2</sup>, Jos Houbraken<sup>3</sup>, Young Woon Lim<sup>1\*</sup>

<sup>1</sup>School of Biological Sciences and Institute of Microbiology, Seoul National University, Seoul 08826, South Korea

<sup>2</sup>Science Unit, Lingnan University, Tuen Mun, Hong Kong

<sup>3</sup>Westerdijk Fungal Biodiversity Centre, Uppsalalaan 8, 3584 CT Utrecht, Netherlands

Supplementary Table 1 Information, halo-tolerance, enzyme activity, gallic acid reaction, GenBank accession numbers for *Penicillium* species isolated from sand and mudflat along the west and south coast of South Korea

| Species                     | Strain          | Number of strain |     |     | Halo-tolerance <sup>a</sup> | Clear zone (mm) <sup>b</sup> |     |      | Gallic acid reaction | Accession No. ( <i>BenA</i> ) |
|-----------------------------|-----------------|------------------|-----|-----|-----------------------------|------------------------------|-----|------|----------------------|-------------------------------|
|                             |                 | DRBC             | GYP | PDA |                             | EA                           | GA  | PA   |                      |                               |
| <i>P. allii</i>             | SFC20151118-M09 | 2                |     |     | T                           | 4.5                          | 1   | 9.5  | -                    | MK682830                      |
| <i>P. allii-sativi</i>      | SFC20151118-M13 |                  | 8   |     | T                           | 2.5                          | 0   | 6    | -                    | MK682831                      |
| <i>P. antarcticum</i>       | SFC20150915-M01 | 12               | 8   | 10  | T                           | 1.5                          | 3.5 | 10.5 | -                    | MK682832                      |
| <i>P. atramentosum</i>      | SFC20150402-M34 | 10               | 2   | 4   | T                           | 2.5                          | 2   | 3    | -                    | MK682833                      |
| <i>P. aurantioviolaceum</i> | SFC20150303-M06 | 10               |     | 2   | T                           | 0                            | 4   | 3    | -                    | MK682834                      |

|                           |                 |    |    |    |   |     |     |      |   |          |
|---------------------------|-----------------|----|----|----|---|-----|-----|------|---|----------|
| <i>P. bialowiezense</i>   | SFC20151014-M03 | 2  |    |    | T | 7   | 6.5 | 11   | - | MK682835 |
| <i>P. bissettii</i>       | SFC100822       |    |    | 2  | T | 3.5 | 1   | 0    | - | MK682836 |
| <i>P. brasilianum</i>     | SFC20150303-M10 | 12 | 8  |    | T | 2.5 | 1   | 1    | - | MK682837 |
| <i>P. brevicompactum</i>  | SFC20151014-M11 | 20 | 4  |    | T | 5   | 6.5 | 12.5 | - | MK682838 |
| <i>P. caperatum</i>       | SFC20151118-M06 | 2  |    |    | T | 0   | 2   | 3    | + | MK682839 |
| <i>P. charlesii</i>       | SFC20150915-M13 | 4  |    |    | T | 0   | 1   | 0    | - | MK682840 |
| <i>P. chrysogenum</i>     | SFC20151014-M02 |    | 6  |    | T | 1   | 6   | 5    | - | MK682841 |
| <i>P. citrinum</i>        | SFC20151118-M02 | 10 | 6  | 16 | T | 5   | 9   | 8    | - | MK682842 |
| <i>P. commune</i>         | SFC20151118-M04 | 10 | 2  |    | T | 1   | 6   | 4    | + | MK682843 |
| <i>P. coprophilum</i>     | SFC20150303-M11 | 2  |    |    | T | 5   | 6   | 9    | - | MK682844 |
| <i>P. copticola</i>       | SFC20150303-M12 |    | 2  |    | T | 3.5 | 6   | 9.5  | + | MK682845 |
| <i>P. cremeogriseum</i>   | SFC20151014-M15 | 2  | 2  | 6  | T | 0   | 1   | 0    | - | MK682846 |
| <i>P. crustosum</i>       | SFC20151118-M08 | 74 | 40 | 12 | T | 2.5 | 5.5 | 2    | - | MK682847 |
| <i>P. daejeonium</i>      | SFC20151014-M05 |    | 2  | 4  | T | 3   | 3   | 12   | - | MK682848 |
| <i>P. decaturense</i>     | SFC20150303-M14 | 6  | 4  |    | T | 3   | 2.5 | 5.5  | + | MK682849 |
| <i>P. digitatum</i>       | SFC20151014-M04 | 4  |    |    | T | 2   | 0   | 0    | + | MK682850 |
| <i>P. echinulatum</i>     | SFC20151014-M09 | 4  |    |    | T | 3   | 6   | 6.5  | - | MK682851 |
| <i>P. expansum</i>        | SFC20150402-M38 | 24 |    |    | T | 3   | 4   | 8.5  | - | MK682852 |
| <i>Penicillium</i> sp. 05 | SFC100716       |    |    | 2  | T | 1   | 6   | 13   | - | MK682887 |
| <i>P. frequentans</i>     | SFC20150915-M09 | 2  |    | 2  | T | 1.5 | 2   | 5    | - | MK682853 |
| <i>P. glabrum</i>         | SFC20150915-M02 | 10 | 4  |    | T | 2   | 5   | 12   | - | MK682854 |
| <i>P. griseofulvum</i>    | SFC20151118-M01 | 12 | 6  |    | T | 3   | 6   | 2.5  | - | MK682855 |

|                              |                 |    |    |    |   |      |     |      |   |          |
|------------------------------|-----------------|----|----|----|---|------|-----|------|---|----------|
| <i>P. guanacastense</i>      | SFC100711       |    | 4  |    | T | 3.75 | 6   | 13   | - | MK682856 |
| <i>P. hetheringtonii</i>     | SFC20151014-M08 | 4  | 2  |    | T | 6    | 5   | 8    | + | MK682857 |
| <i>P. infrapurpureum</i>     | SFC20150915-M12 | 2  |    | 2  | T | 0    | 2   | 0    | - | MK682858 |
| <i>P. janczewskii</i>        | SFC20151014-M10 |    | 2  |    | T | 5    | 5.5 | 10   | + | MK682859 |
| <i>P. janthinellum</i>       | SFC20151118-M12 | 2  |    |    | T | 0    | 4   | 1    | - | MK682860 |
| <i>P. javanicum</i>          | SFC20151118-M07 | 2  |    | 2  | T | 5.5  | 4   | 2    | - | MK682861 |
| <i>P. jejuense</i>           | SFC20150402-M41 | 2  |    |    | T | 2    | 1.5 | 10   | + | MK682862 |
| <i>P. koreense</i>           | SFC20151014-M13 | 20 | 6  | 8  | T | 0    | 0   | 0    | - | MK682863 |
| <i>P. limosum</i>            | SFC20151118-M05 | 2  |    |    | T | 0    | 2   | 3.5  | - | MK682864 |
| <i>P. magnielliptisporum</i> | SFC20151118-M03 |    | 2  |    | T | 3    | 0   | 2    | - | MK682865 |
| <i>P. mallochii</i>          | SFC20150915-M03 | 2  |    |    | T | 2.5  | 5   | 12   | - | MK682866 |
| <i>P. maximae</i>            | SFC20151014-M14 | 6  |    |    | T | 1    | 5   | 10   | - | MK682867 |
| <i>P. menonorum</i>          | SFC20150915-M07 | 6  |    | 4  | T | 4.5  | 5   | 1    | + | MK682868 |
| <i>P. mexicanum</i>          | SFC20151014-M01 |    | 2  |    | T | 1    | 0   | 1    | - | MK682869 |
| <i>P. multicolor</i>         | SFC20151118-M10 | 2  |    |    | T | 0    | 0   | 0    | - | MK682870 |
| <i>P. nalgiovense</i>        | SFC20150402-M42 |    |    | 4  | T | 3    | 5   | 1    | + | MK682871 |
| <i>P. oxalicum</i>           | SFC20150915-M10 | 66 | 24 | 12 | T | 2    | 2   | 12.5 | - | MK682872 |
| <i>P. paneum</i>             | SFC20150915-M14 | 6  |    | 4  | T | 0    | 0   | 1    | - | MK682873 |
| <i>P. piscarium</i>          | SFC20151014-M16 | 2  | 4  |    | T | 0    | 0   | 0    | - | MK682874 |
| <i>P. polonicum</i>          | SFC20151014-M06 | 14 | 4  |    | T | 4    | 6   | 11.5 | + | MK682875 |
| <i>P. raperi</i>             | SFC20150915-M08 | 36 | 32 | 24 | T | 1.5  | 8   | 2    | - | MK682876 |
| <i>P. rubens</i>             | SFC20151014-M07 |    | 10 |    | T | 6    | 6   | 1    | - | MK682877 |

|                           |                 |    |   |   |   |     |     |      |   |          |
|---------------------------|-----------------|----|---|---|---|-----|-----|------|---|----------|
| <i>P. samsonianum</i>     | SFC100899       | 2  |   |   | T | 4.5 | 5   | 4    | - | MK682878 |
| <i>P. solitum</i>         | SFC100989       |    | 4 |   | T | 2   | 2   | 5    | - | MK682879 |
| <i>P. steckii</i>         | SFC20150303-M17 | 4  | 2 | 2 | T | 4.5 | 0   | 10   | - | MK682880 |
| <i>P. sumatrense</i>      | SFC20150915-M04 | 2  | 4 | 6 | T | 1   | 2   | 5.5  | + | MK682881 |
| <i>P. terrigenum</i>      | SFC20150915-M06 |    | 4 | 4 | T | 4.5 | 7   | 6    | + | MK682882 |
| <i>P. velutinum</i>       | SFC20150915-M11 |    |   | 2 | T | 1.5 | 4.5 | 2.5  | - | MK682883 |
| <i>P. viticola</i>        | SFC20150915-M05 | 2  |   |   | T | 2   | 4   | 12.5 | - | MK682884 |
| <i>P. westlingii</i>      | SFC20151118-M11 | 4  |   |   | T | 0   | 4   | 6    | + | MK682885 |
| <i>Penicillium</i> sp. 01 | SFC20150303-M09 | 20 | 8 |   | T | 1   | 1   | 2.5  | - | MK682886 |
| <i>Penicillium</i> sp. 08 | SFC100917       | 4  | 4 |   | T | 1   | 2   | 1    | - | MK682888 |
| <i>Penicillium</i> sp. 10 | SFC100725       |    |   | 2 | T | 0   | 0   | 0    | - | MK682889 |
| <i>Penicillium</i> sp. 11 | SFC101038       | 2  |   |   | T | 4   | 0   | 0    | + | MK682890 |
| <i>Penicillium</i> sp. 13 | SFC100985       | 4  |   |   | T | 0   | 1   | 0    | + | MK682891 |
| <i>Penicillium</i> sp. 14 | SFC100817       | 2  |   |   | T | 3   | 7   | 1.5  | - | MK682892 |
| <i>Penicillium</i> sp. 16 | SFC100919       | 2  | 2 |   | T | 0   | 1   | 0    | - | MK682893 |
| <i>Penicillium</i> sp. 17 | SFC100747       | 2  |   |   | T | 1   | 2   | 1    | - | MK682894 |

<sup>A</sup>Species showed the best growth on MEA supplemented with artificial sea water (ASW) and without ASW (Corrected P < 0.05) are represented as “T”

<sup>b</sup>Endoglucanase (EA),  $\beta$ -glucosidase (GA), and protease (PA) activity

Supplementary Table 2 The number of strains or reads of *Penicillium* species detected from substrate (sand and mudflat), season (summer and winter), and seaside (west and south) using isolation (C), NGS using ITS (IN), and NGS using *benA* (BN)

| Species                     | Seaside |    |       |       |    |       | Season |    |       |        |    |       | Substrate |    |       |         |    |       | Totals |    |       |
|-----------------------------|---------|----|-------|-------|----|-------|--------|----|-------|--------|----|-------|-----------|----|-------|---------|----|-------|--------|----|-------|
|                             | West    |    |       | South |    |       | Summer |    |       | Winter |    |       | Sand      |    |       | Mudflat |    |       | C      | IN | BN    |
|                             | C       | IN | BN    | C     | IN | BN    | C      | IN | BN    | C      | IN | BN    | C         | IN | BN    | C       | IN | BN    |        |    |       |
| <i>P. adametzii</i>         |         | 2  | 154   |       |    | 29    |        | 1  |       |        | 1  | 183   |           | 2  | 10    |         |    | 173   |        | 2  | 183   |
| <i>P. allii</i>             |         |    |       | 2     |    |       | 2      |    |       |        |    |       |           |    |       |         | 2  |       |        | 2  |       |
| <i>P. allii-sativi</i>      |         |    |       | 8     |    |       | 8      |    |       |        |    |       |           |    |       |         | 8  |       |        | 8  |       |
| <i>P. antarcticum</i>       | 26      | 57 | 11151 | 4     | 9  | 70944 | 28     | 60 | 4897  | 2      | 6  | 77198 | 6         | 14 | 41925 | 24      | 52 | 40170 | 30     | 66 | 82095 |
| <i>P. atramentosum</i>      |         |    | 10    | 16    |    |       | 2      |    |       | 14     |    | 10    | 4         |    | 10    | 12      |    |       | 16     |    | 10    |
| <i>P. aurantioviolaceum</i> | 8       |    | 1319  | 4     |    | 2     | 2      |    |       | 10     |    | 1321  | 2         |    | 109   | 10      |    | 1212  | 12     |    | 1321  |
| <i>P. bialowiezense</i>     |         | 37 | 3078  | 2     | 25 | 8571  |        | 41 | 2827  | 2      | 21 | 8822  |           | 35 | 328   | 2       | 27 | 11321 | 2      | 62 | 11649 |
| <i>P. bissetii</i>          | 2       |    | 127   |       |    | 15973 | 2      |    | 21    |        |    | 16079 |           |    | 1568  | 2       |    | 14532 | 2      |    | 16100 |
| <i>P. brasilianum</i>       | 12      | 48 | 174   | 8     | 4  | 1057  |        | 47 |       | 20     | 5  | 1231  | 10        | 27 | 1018  | 10      | 25 | 213   | 20     | 52 | 1231  |
| <i>P. brevicompactum</i>    | 4       | 8  | 5837  | 20    | 27 | 59258 | 2      | 18 | 50558 | 22     | 17 | 14537 | 2         | 4  | 33312 | 22      | 31 | 31783 | 24     | 35 | 65095 |
| <i>P. cairnsense</i>        |         |    | 266   |       |    |       |        |    | 266   |        |    |       |           |    |       |         |    | 266   |        |    | 266   |
| <i>P. caperatum</i>         | 2       |    | 110   |       |    |       |        |    |       | 2      |    | 110   |           |    |       | 2       |    | 110   | 2      |    | 110   |
| <i>P. charlesii</i>         |         |    | 62    | 4     |    |       |        |    |       | 4      |    | 62    |           |    | 61    | 4       |    | 1     | 4      |    | 62    |
| <i>P. chrysogenum</i>       |         |    | 2589  | 6     |    | 476   | 4      |    |       | 2      |    | 3065  |           |    | 2013  | 6       |    | 1052  | 6      |    | 3065  |
| <i>P. citrinum</i>          | 18      | 3  | 3829  | 14    | 24 | 17473 | 6      | 21 | 15963 | 26     | 6  | 5339  | 2         | 26 | 11271 | 30      | 1  | 10031 | 32     | 27 | 21302 |
| <i>P. commune</i>           | 2       |    | 296   | 10    |    | 101   |        |    |       | 12     |    | 397   |           |    | 332   | 12      |    | 65    | 12     |    | 397   |
| <i>P. concentricum</i>      |         |    | 30920 |       |    | 17    |        |    | 30919 |        |    | 18    |           |    | 9924  |         |    | 21013 |        |    | 30937 |
| <i>P. coprophilum</i>       |         |    | 38    | 2     |    |       |        |    |       | 2      |    | 38    |           |    | 38    | 2       |    |       | 2      |    | 38    |
| <i>P. copticola</i>         |         |    |       | 2     |    |       |        |    |       | 2      |    |       |           |    |       | 2       |    |       | 2      |    |       |
| <i>P. corylophilum</i>      |         |    | 4027  |       |    | 3691  |        |    | 4027  |        |    | 3691  |           |    | 3800  |         |    | 3918  |        |    | 7718  |
| <i>P. cremeogriseum</i>     | 8       |    | 3122  | 2     |    | 859   | 6      |    | 2886  | 4      |    | 1095  | 2         |    | 847   | 8       |    | 3134  | 10     |    | 3981  |

|                              |    |     |       |     |     |       |    |     |       |     |     |       |    |     |       |     |      |       |     |       |       |
|------------------------------|----|-----|-------|-----|-----|-------|----|-----|-------|-----|-----|-------|----|-----|-------|-----|------|-------|-----|-------|-------|
| <i>P. crustosum</i>          | 22 | 220 | 44774 | 104 | 142 | 23213 | 20 | 208 | 25365 | 106 | 154 | 42622 | 18 | 206 | 29461 | 108 | 156  | 38526 | 126 | 362   | 67987 |
| <i>P. daejeonium</i>         | 2  | 19  | 7023  | 4   | 1   | 7496  | 2  | 17  | 1250  | 4   | 3   | 13269 | 6  | 15  | 12769 | 5   | 1750 | 6     | 20  | 14519 |       |
| <i>P. daleae</i>             |    |     | 3403  |     |     | 676   |    |     | 1644  |     |     | 2435  |    |     | 16    |     | 4063 |       |     | 4079  |       |
| <i>P. decaturense</i>        |    |     | 605   | 10  |     | 499   |    |     |       | 10  |     | 1104  | 4  |     | 628   | 6   |      | 476   | 10  |       | 1104  |
| <i>P. digitatum</i>          |    | 3   | 154   | 4   | 11  | 425   |    | 6   | 1     | 4   | 8   | 578   | 4  | 2   | 8     |     | 12   | 571   | 4   | 14    | 579   |
| <i>P. echinulatum</i>        |    |     |       | 4   |     |       |    | 2   |       |     | 2   |       |    |     |       | 4   |      |       |     | 4     |       |
| <i>P. expansum</i>           | 10 |     | 29690 | 14  |     | 3848  |    |     | 25599 | 24  |     | 7939  | 4  |     | 24067 | 20  |      | 9471  | 24  |       | 33538 |
| <i>P. exsudans</i>           |    |     |       | 2   |     | 4196  | 2  |     | 3929  |     |     | 267   |    |     | 4196  | 2   |      |       | 2   |       | 4196  |
| <i>P. frequentans</i>        | 2  |     | 1073  | 2   |     | 681   | 4  |     | 1     |     |     | 1753  | 2  |     | 1708  | 2   |      | 46    | 4   |       | 1754  |
| <i>P. georgiense</i>         |    | 10  |       |     |     |       |    | 9   |       |     | 1   |       |    | 7   |       | 3   |      |       |     | 10    |       |
| <i>P. glabrum</i>            | 8  |     | 560   | 6   |     | 13320 | 10 |     | 10045 | 4   |     | 3835  | 6  |     | 13686 | 8   |      | 194   | 14  |       | 13880 |
| <i>P. griseofulvum</i>       | 16 |     | 828   | 2   |     | 3652  |    |     |       | 18  |     | 4480  | 8  |     | 2537  | 10  |      | 1943  | 18  |       | 4480  |
| <i>P. griseopurpureum</i>    |    |     | 954   |     |     | 921   |    |     |       |     |     | 1875  |    |     | 921   |     |      | 954   |     |       | 1875  |
| <i>P. guanacastense</i>      |    |     |       | 4   |     |       |    | 4   |       |     |     |       |    |     |       | 4   |      |       | 4   |       |       |
| <i>P. hetheringtonii</i>     | 2  |     | 6946  | 4   |     | 8393  |    |     | 3814  | 6   |     | 11525 | 4  |     | 4350  | 2   |      | 10989 | 6   |       | 15339 |
| <i>P. infrapurpureum</i>     | 2  |     | 8     | 2   |     |       | 4  |     |       |     |     | 8     | 2  |     |       | 2   |      | 8     | 4   |       | 8     |
| <i>P. janczewskii</i>        |    |     |       | 2   |     | 4     |    |     |       | 2   |     | 4     |    |     |       | 2   |      | 4     | 2   |       | 4     |
| <i>P. janthinellum</i>       |    |     |       | 2   |     |       |    | 2   |       |     |     |       |    |     |       | 2   |      |       |     | 2     |       |
| <i>P. javanicum</i>          | 2  |     | 811   | 2   |     | 77    | 2  |     |       | 2   |     | 888   |    |     | 170   | 4   |      | 718   | 4   |       | 888   |
| <i>P. jejuense</i>           | 2  |     |       |     |     |       | 2  |     |       |     |     |       | 2  |     |       |     |      |       |     | 2     |       |
| <i>P. koreense</i>           | 20 |     | 11373 | 14  |     | 62981 | 20 |     | 43778 | 14  |     | 30576 | 2  |     | 41294 | 32  |      | 33060 | 34  |       | 74354 |
| <i>P. limosum</i>            | 2  |     | 904   |     |     | 713   |    |     | 1     | 2   |     | 1616  |    |     | 564   | 2   |      | 1053  | 2   |       | 1617  |
| <i>P. magnielliptisporum</i> | 2  |     | 3567  |     |     | 292   |    |     | 2     | 2   |     | 3857  | 2  |     | 11    |     |      | 3848  | 2   |       | 3859  |
| <i>P. mallochii</i>          | 2  |     |       |     |     |       |    | 2   |       |     |     |       |    |     |       |     |      |       |     | 2     |       |
| <i>P. maximae</i>            |    | 3   | 1012  | 6   | 3   | 38    | 2  | 4   |       | 4   | 2   | 1050  | 2  | 3   | 2     | 4   | 3    | 1048  | 6   | 6     | 1050  |
| <i>P. menororum</i>          | 10 |     | 25729 |     |     | 35903 | 4  |     | 6559  | 6   |     | 55073 |    |     | 45051 | 10  |      | 16581 | 10  |       | 61632 |

|                        |    |    |       |    |     |       |    |     |       |    |     |       |    |     |       |    |     |       |     |     |       |
|------------------------|----|----|-------|----|-----|-------|----|-----|-------|----|-----|-------|----|-----|-------|----|-----|-------|-----|-----|-------|
| <i>P. mexicanum</i>    |    |    | 20090 | 2  |     | 799   |    |     | 20089 | 2  |     | 800   |    |     | 14714 | 2  |     | 6175  | 2   |     | 20889 |
| <i>P. multicolor</i>   |    | 2  |       | 2  | 3   | 793   | 2  |     |       | 5  | 793 |       | 2  | 648 | 2     | 3  | 145 | 2     | 5   |     | 793   |
| <i>P. nalgiovense</i>  | 4  |    | 283   |    |     |       | 4  |     | 283   |    |     |       |    |     | 4     |    |     | 283   | 4   |     | 283   |
| <i>P. ochrochloron</i> |    |    |       |    |     | 45    |    |     |       |    |     | 45    |    |     | 45    |    |     |       |     |     | 45    |
| <i>P. olsonii</i>      |    |    | 6910  |    |     | 1     |    |     | 6906  |    |     | 5     |    |     | 2420  |    |     | 4491  |     |     | 6911  |
| <i>P. ornatum</i>      |    |    | 31    |    |     |       |    |     |       |    |     | 31    |    |     | 31    |    |     |       |     |     | 31    |
| <i>P. ovatum</i>       |    |    | 147   |    |     |       |    |     | 147   |    |     |       |    |     |       |    |     | 147   |     |     | 147   |
| <i>P. oxalicum</i>     | 54 | 65 | 13429 | 48 | 32  | 4688  | 34 | 69  | 670   | 68 | 28  | 17447 | 16 | 53  | 12738 | 86 | 44  | 5379  | 102 | 97  | 18117 |
| <i>P. paneum</i>       |    |    | 730   | 10 |     | 1128  | 6  |     |       | 4  |     | 1858  | 2  |     | 1250  | 8  |     | 608   | 10  |     | 1858  |
| <i>P. paxilli</i>      |    |    | 825   |    |     |       |    |     | 824   |    |     | 1     |    |     |       |    |     | 825   |     |     | 825   |
| <i>P. piscarium</i>    | 4  |    |       | 2  |     | 16    | 2  |     |       | 4  |     | 16    | 2  |     |       | 4  |     | 16    | 6   |     | 16    |
| <i>P. polonicum</i>    |    |    | 12896 | 18 |     | 4579  |    |     | 11509 | 18 |     | 5966  | 2  |     | 13164 | 16 |     | 4311  | 18  |     | 17475 |
| <i>P. radicicola</i>   |    |    | 8     |    |     | 1000  |    |     |       |    |     | 1008  |    |     | 1008  |    |     |       |     |     | 1008  |
| <i>P. raperi</i>       | 92 | 7  | 17996 |    | 237 | 29299 | 84 | 239 | 8759  | 8  | 5   | 38536 | 12 | 110 | 20204 | 80 | 134 | 27091 | 92  | 244 | 47295 |
| <i>P. rubefaciens</i>  |    |    |       |    |     | 54454 |    |     | 54116 |    |     | 338   |    |     | 22581 |    |     | 31873 |     |     | 54454 |
| <i>P. rubens</i>       | 2  |    |       | 8  |     | 86    | 6  |     |       | 4  |     | 86    | 8  |     | 4     | 2  |     | 82    | 10  |     | 86    |
| <i>P. samsonianum</i>  |    |    | 296   | 2  |     |       |    |     |       | 2  |     | 296   | 2  |     | 296   |    |     |       | 2   |     | 296   |
| <i>P. sanguifluum</i>  |    |    | 1470  |    |     |       |    |     | 1470  |    |     |       |    |     | 1     |    |     | 1469  |     |     | 1470  |
| <i>P. solitum</i>      |    |    | 1680  | 4  |     | 871   |    |     |       | 4  |     | 2551  |    |     | 1025  | 4  |     | 1526  | 4   |     | 2551  |
| <i>P. steckii</i>      |    |    | 7251  | 8  |     | 16334 | 2  |     | 230   | 6  |     | 23355 | 2  |     | 6457  | 6  |     | 17128 | 8   |     | 23585 |
| <i>P. sumatrense</i>   | 8  | 3  | 560   | 4  | 1   | 133   | 10 | 3   |       | 2  | 1   | 693   | 10 | 1   | 262   | 2  | 3   | 431   | 12  | 4   | 693   |
| <i>P. terrigenum</i>   | 4  | 5  | 16584 | 4  | 5   | 45939 | 4  | 2   | 6     | 4  | 8   | 62517 | 6  | 5   | 34188 | 2  | 5   | 28335 | 8   | 10  | 62523 |
| <i>P. ulaiense</i>     |    |    |       |    |     | 343   |    |     |       |    |     | 343   |    |     | 343   |    |     |       |     |     | 343   |
| <i>P. velutinum</i>    | 2  |    | 7173  |    |     | 1476  | 2  |     | 1     |    |     | 8648  | 2  |     | 2734  |    |     | 5915  | 2   |     | 8649  |
| <i>P. viticola</i>     | 2  | 23 | 2274  |    | 2   |       | 2  | 22  | 2274  |    | 3   |       | 2  | 21  |       |    | 4   | 2274  | 2   | 25  | 2274  |
| <i>P. westlingii</i>   |    |    | 3     | 4  |     | 393   | 2  |     | 1     | 2  |     | 395   | 2  |     | 395   | 2  |     | 1     | 4   |     | 396   |

|                           |    |      |      |       |    |      |    |       |    |       |      |      |    |       |   |    |      |   |    |      |      |     |
|---------------------------|----|------|------|-------|----|------|----|-------|----|-------|------|------|----|-------|---|----|------|---|----|------|------|-----|
| <i>P. yarmokense</i>      |    | 820  |      | 1     |    | 820  |    | 1     |    | 821   |      | 821  |    | 821   |   |    |      |   |    |      |      |     |
| <i>Penicillium</i> sp. 01 | 18 | 3509 | 10   | 15976 | 14 | 8047 | 14 | 11438 | 16 | 10737 | 12   | 8748 | 28 | 19485 |   |    |      |   |    |      |      |     |
| <i>Penicillium</i> sp. 08 | 4  | 2    | 404  | 4     | 12 | 2105 | 4  | 7     | 4  | 7     | 2509 | 4    | 3  | 1270  | 4 | 11 | 1239 | 8 | 14 | 2509 |      |     |
| <i>Penicillium</i> sp. 10 |    |      |      | 2     |    |      |    |       |    |       |      |      |    |       |   |    |      |   |    | 2    |      |     |
| <i>Penicillium</i> sp. 11 | 2  |      | 83   |       |    |      |    | 2     |    | 83    |      | 83   | 2  |       |   |    |      |   |    | 2    | 83   |     |
| <i>Penicillium</i> sp. 13 | 2  |      | 4558 | 2     |    | 4587 |    |       | 4  |       | 9145 |      |    | 3793  | 4 |    | 5352 |   |    | 4    | 9145 |     |
| <i>Penicillium</i> sp. 14 | 2  |      | 246  |       |    | 75   | 2  |       |    |       | 321  |      |    | 7     | 2 |    | 314  |   |    | 2    | 321  |     |
| <i>Penicillium</i> sp. 16 |    |      | 8    | 4     |    | 439  |    |       | 4  |       | 447  | 4    |    | 447   |   |    |      |   |    | 4    | 447  |     |
| <i>Penicillium</i> sp. 17 | 2  |      |      |       |    |      | 2  |       |    |       |      |      |    |       |   |    |      |   |    |      | 2    |     |
| <i>Penicillium</i> sp. 21 |    |      |      |       |    | 381  |    |       |    |       | 381  |      |    | 381   |   |    |      |   |    |      | 381  |     |
| <i>Penicillium</i> sp. 22 |    |      | 168  |       |    | 790  |    |       |    |       | 958  |      |    |       |   |    | 958  |   |    |      | 958  |     |
| <i>Penicillium</i> sp. 23 |    |      | 299  |       |    |      |    |       |    |       | 299  |      |    | 299   |   |    |      |   |    |      | 299  |     |
| <i>Penicillium</i> sp. 24 |    |      | 43   |       |    |      |    |       |    |       | 43   |      |    |       |   |    | 43   |   |    |      | 43   |     |
| <i>Penicillium</i> sp. 25 |    |      | 630  |       |    | 1    |    |       |    |       | 630  |      |    | 1     |   |    | 1    |   |    |      | 630  | 631 |
| <i>Penicillium</i> sp. 26 |    |      | 45   |       |    |      |    |       |    |       | 45   |      |    |       |   |    | 28   |   |    |      | 17   | 45  |
| <i>Penicillium</i> sp. 27 |    |      | 28   |       |    |      |    |       |    |       | 28   |      |    |       |   |    | 28   |   |    |      | 28   | 28  |
| <i>Penicillium</i> sp. 28 | 12 |      |      | 4     |    |      | 10 |       |    |       | 6    |      |    | 8     |   |    | 8    |   |    |      | 16   |     |
| <i>Penicillium</i> sp. 29 | 13 |      |      | 9     |    |      | 16 |       |    |       | 6    |      |    | 6     |   |    | 16   |   |    |      | 22   |     |
| <i>Penicillium</i> sp. 33 | 18 |      |      | 40    |    |      | 33 |       |    |       | 25   |      |    | 36    |   |    | 22   |   |    |      | 58   |     |
| <i>Penicillium</i> sp. 34 | 19 |      |      | 12    |    |      | 14 |       |    |       | 17   |      |    | 20    |   |    | 11   |   |    |      | 31   |     |
| <i>Penicillium</i> sp. 36 | 8  |      |      | 94    |    |      | 79 |       |    |       | 23   |      |    | 94    |   |    | 8    |   |    |      | 102  |     |
| <i>Penicillium</i> sp. 38 | 3  |      |      | 10    |    |      | 8  |       |    |       | 5    |      |    | 4     |   |    | 9    |   |    |      | 13   |     |
| <i>Penicillium</i> sp. 39 | 12 |      |      | 9     |    |      | 7  |       |    |       | 14   |      |    | 8     |   |    | 13   |   |    |      | 21   |     |



Supplementary Table 3 Growth rate of *Penicillium* species at different temperature on malt extract agar

| Species                     | Strain          | Growth rate (mm) |      |      |      |      |
|-----------------------------|-----------------|------------------|------|------|------|------|
|                             |                 | 10°C             | 15°C | 20°C | 25°C | 30°C |
| <i>P. allii</i>             | SFC20151118-M09 | 10.3             | 23.0 | 32.0 | 39.0 | 16.3 |
| <i>P. allii-sativi</i>      | SFC20151118-M13 | 8.7              | 20.7 | 28.3 | 33.7 | 31.7 |
| <i>P. antarcticum</i>       | SFC20150915-M01 | 10.0             | 23.7 | 32.7 | 46.3 | 7.0  |
| <i>P. atramentosum</i>      | SFC20150402-M34 | 8.3              | 14.3 | 14.3 | 17.7 | 8.7  |
| <i>P. aurantioviolaceum</i> | SFC20150303-M06 | 9.3              | 22.0 | 32.3 | 42.0 | 38.0 |
| <i>P. bialowiezense</i>     | SFC20151014-M03 | 11.0             | 17.3 | 22.7 | 24.3 | 0.0  |
| <i>P. bissettii</i>         | SFC100822       | 6.3              | 19.0 | 28.0 | 35.3 | 35.7 |
| <i>P. brasilianum</i>       | SFC20150303-M10 | 5.7              | 12.7 | 16.3 | 30.0 | 42.7 |
| <i>P. brevicompactum</i>    | SFC20151014-M11 | 7.0              | 16.0 | 22.0 | 22.0 | 3.0  |
| <i>P. caperatum</i>         | SFC20151118-M06 | 3.0              | 12.0 | 16.7 | 23.7 | 35.3 |
| <i>P. charlesii</i>         | SFC20150915-M13 | 3.0              | 8.0  | 15.3 | 18.0 | 9.0  |
| <i>P. chrysogenum</i>       | SFC20151014-M02 | 9.3              | 22.0 | 26.3 | 34.7 | 38.3 |
| <i>P. citrinum</i>          | SFC20151118-M02 | 3.0              | 9.0  | 17.0 | 26.0 | 30.3 |
| <i>P. commune</i>           | SFC20151118-M04 | 13.0             | 26.7 | 33.0 | 30.7 | 13.3 |
| <i>P. coprophilum</i>       | SFC20150303-M11 | 6.7              | 13.3 | 24.0 | 27.3 | 29.3 |
| <i>P. copticola</i>         | SFC20150303-M12 | 3.0              | 10.0 | 21.3 | 28.3 | 20.7 |
| <i>P. cremeogriseum</i>     | SFC20151014-M15 | 3.0              | 11.7 | 23.3 | 33.7 | 45.3 |
| <i>P. crustosum</i>         | SFC20151118-M08 | 12.0             | 24.0 | 31.7 | 34.3 | 28.0 |
| <i>P. daejeonium</i>        | SFC20151014-M05 | 5.3              | 14.0 | 22.0 | 28.3 | 12.7 |
| <i>P. decaturense</i>       | SFC20150303-M14 | 6.0              | 17.3 | 27.0 | 33.0 | 9.7  |
| <i>P. digitatum</i>         | SFC20151014-M04 | 4.7              | 16.0 | 24.3 | 25.0 | 6.0  |
| <i>P. echinulatum</i>       | SFC20151014-M09 | 11.3             | 23.7 | 30.3 | 35.0 | 13.0 |
| <i>P. expansum</i>          | SFC20150402-M38 | 11.0             | 19.7 | 27.7 | 34.7 | 3.3  |

|                              |                 |      |      |      |      |      |
|------------------------------|-----------------|------|------|------|------|------|
| <i>P. exsudans</i>           | SFC100716       | 4.7  | 13.3 | 20.3 | 27.7 | 29.0 |
| <i>P. frequentans</i>        | SFC20150915-M09 | 7.7  | 19.7 | 27.0 | 35.0 | 24.7 |
| <i>P. glabrum</i>            | SFC20150915-M02 | 9.7  | 19.3 | 28.3 | 34.3 | 34.0 |
| <i>P. griseofulvum</i>       | SFC20151118-M01 | 7.7  | 17.3 | 24.0 | 26.3 | 24.7 |
| <i>P. guanacastense</i>      | SFC100711       | 5.3  | 10.0 | 16.7 | 25.0 | 31.3 |
| <i>P. hetheringtonii</i>     | SFC20151014-M08 | 3.3  | 12.0 | 17.7 | 31.0 | 32.0 |
| <i>P. infrapurpureum</i>     | SFC20150915-M12 | 4.0  | 8.3  | 13.3 | 16.0 | 7.7  |
| <i>P. janczewskii</i>        | SFC20151014-M10 | 4.3  | 11.3 | 18.0 | 26.0 | 19.3 |
| <i>P. janthinellum</i>       | SFC20151118-M12 | 3.3  | 12.7 | 20.7 | 29.3 | 35.0 |
| <i>P. javanicum</i>          | SFC20151118-M07 | 8.3  | 16.0 | 22.0 | 21.3 | 0.0  |
| <i>P. jejuense</i>           | SFC20150402-M41 | 7.3  | 17.7 | 29.7 | 39.7 | 14.0 |
| <i>P. koreense</i>           | SFC20151014-M13 | 3.0  | 9.0  | 20.3 | 28.7 | 33.3 |
| <i>P. limosum</i>            | SFC20151118-M05 | 3.0  | 13.0 | 26.3 | 38.0 | 47.0 |
| <i>P. magnielliptisporum</i> | SFC20151118-M03 | 10.0 | 7.7  | 10.7 | 11.3 | 6.3  |
| <i>P. mallochii</i>          | SFC20150915-M03 | 4.0  | 11.3 | 20.0 | 29.0 | 23.0 |
| <i>P. maximae</i>            | SFC20151014-M14 | 3.0  | 12.0 | 21.0 | 30.0 | 32.7 |
| <i>P. menonorum</i>          | SFC20150915-M07 | 0.0  | 3.0  | 9.0  | 13.0 | 19.0 |
| <i>P. mexicanum</i>          | SFC20151014-M01 | 8.7  | 16.3 | 15.7 | 17.7 | 3.0  |
| <i>P. multicolor</i>         | SFC20151118-M10 | 3.0  | 7.7  | 12.3 | 17.0 | 13.0 |
| <i>P. nalgiovense</i>        | SFC20150402-M42 | 5.7  | 17.0 | 28.0 | 34.3 | 17.0 |
| <i>P. oxalicum</i>           | SFC20150915-M10 | 5.0  | 20.0 | 32.3 | 43.3 | 50.0 |
| <i>P. paneum</i>             | SFC20150915-M14 | 10.0 | 25.3 | 38.3 | 44.7 | 47.7 |
| <i>P. piscarium</i>          | SFC20151014-M16 | 5.0  | 16.0 | 26.3 | 37.3 | 44.7 |
| <i>P. polonicum</i>          | SFC20151014-M06 | 10.0 | 22.0 | 32.0 | 33.7 | 21.3 |
| <i>P. raperi</i>             | SFC20150915-M08 | 8.7  | 20.7 | 28.0 | 35.3 | 36.0 |
| <i>P. rubens</i>             | SFC20151014-M07 | 9.7  | 19.0 | 25.3 | 39.0 | 37.0 |
| <i>P. samsonianum</i>        | SFC100899       | 8.0  | 16.0 | 23.0 | 23.3 | 9.3  |

|                           |                 |      |      |      |      |      |
|---------------------------|-----------------|------|------|------|------|------|
| <i>P. solitum</i>         | SFC100989       | 11.7 | 20.0 | 25.0 | 30.0 | 3.0  |
| <i>P. steckii</i>         | SFC20150303-M17 | 3.0  | 9.0  | 19.7 | 28.0 | 23.7 |
| <i>P. sumatrense</i>      | SFC20150915-M04 | 3.7  | 14.3 | 24.7 | 31.3 | 17.3 |
| <i>P. terrigenum</i>      | SFC20150915-M06 | 3.0  | 12.3 | 20.7 | 32.0 | 27.0 |
| <i>P. velutinum</i>       | SFC20150915-M11 | 6.0  | 19.0 | 31.3 | 45.0 | 50.0 |
| <i>P. viticola</i>        | SFC20150915-M05 | 6.7  | 14.7 | 24.0 | 29.3 | 9.0  |
| <i>P. westlingii</i>      | SFC20151118-M11 | 7.7  | 16.0 | 19.7 | 20.3 | 9.3  |
| <i>Penicillium</i> sp. 01 | SFC20150303-M09 | 5.3  | 13.0 | 25.0 | 33.0 | 31.7 |
| <i>Penicillium</i> sp. 08 | SFC100917       | 6.0  | 17.0 | 24.3 | 35.3 | 42.7 |
| <i>Penicillium</i> sp. 10 | SFC100725       | 0.0  | 8.3  | 18.7 | 19.3 | 11.0 |
| <i>Penicillium</i> sp. 11 | SFC101038       | 0.0  | 3.0  | 9.0  | 13.0 | 19.0 |
| <i>Penicillium</i> sp. 13 | SFC100985       | 4.7  | 13.7 | 20.3 | 32.7 | 40.7 |
| <i>Penicillium</i> sp. 14 | SFC100817       | 7.7  | 15.7 | 27.0 | 33.7 | 19.7 |
| <i>Penicillium</i> sp. 16 | SFC100919       | 3.0  | 13.7 | 21.7 | 36.7 | 43.0 |
| <i>Penicillium</i> sp. 17 | SFC100747       | 3.0  | 10.3 | 22.3 | 28.3 | 37.7 |

---

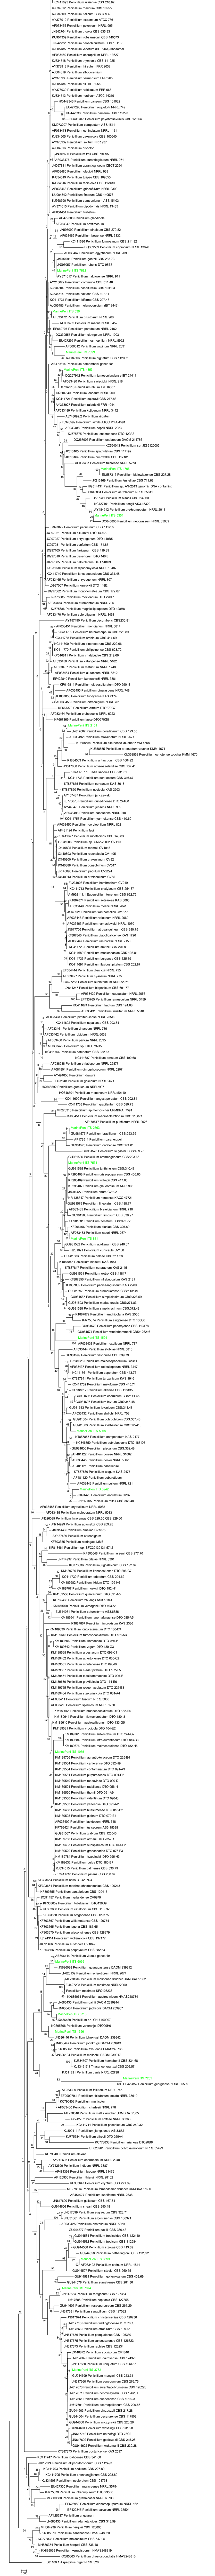

Supplementary Figure 1 Neighbor joining tree inferred from the internal transcribed spacer (ITS) sequences of *Penicillium* species. The scale bar indicates the number of nucleotide substitutions per site. OTUs detected from ITS-NGS are indicated in green color.

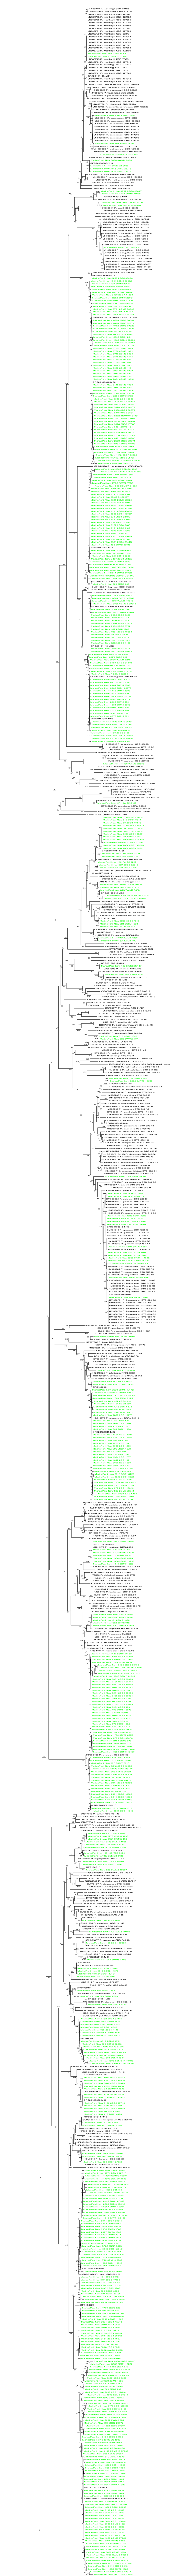

Supplement: 41598_2019_49966_MOESM1_ESM.pdf [file 41598_2019_49966_MOESM1_ESM.pdf]
